# Supplementary material
Source: Springer Nature journal article supplement (https://www.springermedizin.de/resource/supplementary/12879_2010_1270_MOESM3_ESM.pdf/9442230)
Supplement: MOESM3 [file 9442230]

| Country       | Epi | BSS | Start | GenPop                                                           | Youth | MSM | IDU | SW | STIp | PLWHA | Migr | Other        |
|---------------|-----|-----|-------|------------------------------------------------------------------|-------|-----|-----|----|------|-------|------|--------------|
| Austria       | C   | No  |       | No                                                               | No    | No  | No  | No |      | No    |      |              |
| Belgium       | C   | Yes |       | 4                                                                | 2     | 2   | 3   | 1  | 1    | No    | 1    | Prison       |
| Bulgaria      | LL  |     |       |                                                                  |       |     |     |    |      |       |      |              |
| Cyprus        | C   | Yes | 1988  | 1                                                                | 1     | No  |     | No | No   | No    | No   |              |
| Czech R       | LL  | Yes |       | No                                                               | No    | No  | n.a | No | No   | No    | No   |              |
| Denmark       | C   | Yes |       | No                                                               | No    | 1   | No  | No | No   | No    | No   |              |
| Estonia       | C   | Yes | 2004  | 2                                                                | 1     | 2   | 2   | 2  | No   | 1     | No   | Prison       |
| Finland       | C   | Yes | 1995  | No                                                               | 1     |     | 1   | No | 1    | No    | No   |              |
| France        | C   | Yes | 1985  | 3                                                                | 1     | 2   | 6   | No | 1    | 1     |      |              |
| Germany       | C   | Yes | 1987  | 1                                                                | 2     | 3   | No  | No | 1    | No    | No   |              |
| Greece        | C   |     |       | 1                                                                |       |     | 1   |    |      |       | No   |              |
| Hungary       | LL  | No  |       | No                                                               | No    | No  | No  | No | No   | No    | No   |              |
| Iceland       | C   | No  |       | No                                                               |       | No  | Yes | No | No   | No    | No   |              |
| Ireland       | C   | No  |       |                                                                  |       | 3   | 1   | No | No   | No    | No   | Prison       |
| Italy         | C   | No  |       | No                                                               |       |     |     |    | 1    | No    |      |              |
| Latvia        | C   | Yes | 1997  | No                                                               | 2     | 1   | 4   | No | No   | No    | No   |              |
| Liechtenstein | C   | No  |       | No                                                               | No    | No  | No  | No | No   | No    | No   |              |
| Lithuania     | C   | Yes | n.a   |                                                                  | 2     | 1   | 4   | 3  | 1    | No    | No   |              |
| Luxembourg    | C   | No  |       | No                                                               | 1     | No  | 1   | 1  | No   | No    | No   |              |
| Malta         | C   | No  |       | No                                                               | No    | No  | No  | No | 1    | No    | No   |              |
| Netherlands   | C   | No  | 80s   | 1                                                                | 2     | 2   | 2   | 3  | 2    | No    | 4    |              |
| Norway        | C   | No  |       | 1                                                                | No    |     | No  |    | No   | No    | No   |              |
| Poland        | C   | Yes | 2000  | 3                                                                |       |     | 1   | No | No   | No    | No   |              |
| Portugal      | C   |     |       |                                                                  |       |     |     |    |      |       |      |              |
| Romania       | LL  |     |       |                                                                  |       |     |     |    |      |       |      |              |
| Slovakia      | LL  | No  |       | No                                                               | No    | No  | No  | No | No   | No    | No   |              |
| Slovenia      | LL  | Yes | 1996  | No                                                               | No    | 3   | 2   | No | No   | No    | No   |              |
| Spain         | C   | Yes | n.a   | 1                                                                | 4     | 2   | 3   | 2  | 2    | 1     | No   | Prison       |
| Sweden        | C   | Yes | 1987  | 1                                                                | 2     | 1   | No  | No | No   | No    | No   |              |
| Switzerland   | C   | Yes | 1987  | 2                                                                | 3     | 1   | 1   | 3  | No   | 3     |      | Condom sales |
| UK            | C   | Yes | 1990  | 4                                                                | 4     | 5   | 5   | 3  | 4    | 2     | 4    |              |
| Notes:        |     |     |       |                                                                  |       |     |     |    |      |       |      |              |
|               |     |     |       | established surveillance: 3 and more surveys                     |       |     |     |    |      |       |      |              |
|               |     |     |       | beginning of surveillance: 2 surveys or one and the next planned |       |     |     |    |      |       |      |              |
|               |     |     |       | planned surveillance: first survey only                          |       |     |     |    |      |       |      |              |
| Blank cells   |     |     |       | no questionnaire returned                                        |       |     |     |    |      |       |      |              |

The numbers in the cells relate to the number of different data sources used for behavioural surveillance in a population

|                |                                                                                                                   |
|----------------|-------------------------------------------------------------------------------------------------------------------|
| <b>Epi</b>     | Type of HIV epidemic: concentrated (C), low level (LL) (There are no HIV generalised epidemics in Europe)         |
| <b>BSS</b>     | Existence of a behavioural surveillance system (yes/no)                                                           |
| <b>Start</b>   | Year of initiation of system                                                                                      |
| <b>Gen Pop</b> | Surveillance/surveys in general population (yes/no = reported existence of a system in this population)           |
| <b>Youth</b>   | Surveillance/surveys in youth, (yes/no = reported existence of a system in this population)                       |
| <b>MSM</b>     | Surveillance/surveys in MSM men having sex with men, (yes/no = reported existence of a system)                    |
| <b>IDU</b>     | Surveillance/surveys in intravenous drug users; (yes/no = reported existence of a system in this population)      |
| <b>SW</b>      | Surveillance/surveys in sex workers; (yes/no = reported existence of a system in this population)                 |
| <b>STIp</b>    | Surveillance/surveys in STI clinic patients; (yes/no = reported existence of a system in this population)         |
| <b>PLWHA</b>   | Surveillance/surveys in people living with HIV/AIDS; (yes/no = reported existence of a system in this population) |
| <b>Migr</b>    | Surveillance/surveys in migrants and ethnic minorities; (yes/no = reported existence of a system)                 |
| <b>Other</b>   | Surveillance/surveys in other populations                                                                         |
| <b>n.a</b>     | Details not available                                                                                             |
